# Supplementary material for: Individual and area-level determinants associated with C-reactive protein as a marker of cardiometabolic risk among adults: Results from the German National Health Interview and Examination Survey 2008-2011
Source: PubMed Central journal article supplement (PMC6368296; doi:10.1371/journal.pone.0211774), 2019-02-08
Supplement: pone.0211774.s001.pdf [file pone.0211774.s001.pdf]

**S1 Table. Bivariate associations of differently operationalized population-weighted PM<sub>10</sub> concentration with hsCRP among adults aged 18-79 years (n=6,768).**

| Population-weighted ambient PM <sub>10</sub> concentration | Categories of hsCRP |          |         | <i>P</i> value* | Geometric mean of hsCRP<br>mg/L | <i>P</i> value** |
|------------------------------------------------------------|---------------------|----------|---------|-----------------|---------------------------------|------------------|
|                                                            | <1 mg/L             | 1-3 mg/L | >3 mg/L |                 |                                 |                  |
| <b>Exposure category</b>                                   |                     |          |         |                 |                                 |                  |
| <15 µg/m <sup>3</sup>                                      | 44.4                | 33.2     | 22.4    | 0.398           | 1.20                            | 0.394            |
| ≥15-<20 µg/m <sup>3</sup>                                  | 46.6                | 33.0     | 20.4    |                 | 1.13                            |                  |
| ≥20-<25 µg/m <sup>3</sup>                                  | 47.6                | 30.8     | 21.6    |                 | 1.13                            |                  |
| ≥25 µg/m <sup>3</sup>                                      | 42.4                | 30.0     | 27.6    |                 | 1.30                            |                  |
| <20 µg/m <sup>3</sup>                                      | 46.0                | 33.1     | 20.9    | 0.292           | 1.15                            | 0.884            |
| ≥20 µg/m <sup>3</sup>                                      | 47.2                | 30.7     | 22.1    |                 | 1.14                            |                  |
| Lowest quintile                                            | 44.6                | 31.5     | 24.0    | 0.089           | 1.20                            | 0.227            |
| Middle three quintiles                                     | 47.8                | 32.2     | 20.0    |                 | 1.11                            |                  |
| Highest quintile                                           | 44.0                | 33.5     | 22.5    |                 | 1.21                            |                  |

\**P*-values obtained from Rao-Scott chi-square test of independence with second order adjustment. \*\**P*-values for change in mean values obtained from linear regression models.
