# Supplementary material for: Individual and area-level determinants associated with C-reactive protein as a marker of cardiometabolic risk among adults: Results from the German National Health Interview and Examination Survey 2008-2011
Source: PubMed Central journal article supplement (PMC6368296; doi:10.1371/journal.pone.0211774), 2019-02-08
Supplement: pone.0211774.s002.pdf [file pone.0211774.s002.pdf]

**S2 Table. Residential population-weighted ambient PM<sub>10</sub> concentration levels in 2009 across exposure categories in the DEGS1 study sample of adults aged 18-79 years and in the total population in Germany in 2009.**

| Population-weighted ambient PM <sub>10</sub> concentration | DEGS1 sample     |      | Total population in Germany |        |
|------------------------------------------------------------|------------------|------|-----------------------------|--------|
|                                                            | %* (95%CI*)      | Mean | %**                         | Mean** |
| <b>Mean [µg/m<sup>3</sup>]</b>                             |                  | 18.5 |                             | 18.7   |
| <b>Exposure category</b>                                   |                  |      |                             |        |
| Level 1 (<10 µg/m <sup>3</sup> )                           | -                |      | -                           |        |
| Level 2 (≥10-<15 µg/m <sup>3</sup> )                       | 17.9 (12.5-24.9) |      | 14.9                        |        |
| Level 3 (≥15-<20 µg/m <sup>3</sup> )                       | 48.3 (40.5-56.1) |      | 50.3                        |        |
| Level 4 (≥20-<25 µg/m <sup>3</sup> )                       | 31.0 (24.4-38.5) |      | 29.9                        |        |
| Level 5 (≥25-<30 µg/m <sup>3</sup> )                       | 2.9 (1.2-6.8)    |      | 4.7                         |        |
| Level 6 (≥30-<35 µg/m <sup>3</sup> )                       | -                |      | 0.2                         |        |
| Level 7 (≥35-<40 µg/m <sup>3</sup> )                       | -                |      | -                           |        |
| Level 8 (≥40 µg/m <sup>3</sup> )                           | -                |      | -                           |        |
| <b>Level ≥4 (≥20 µg/m<sup>3</sup>)</b>                     | 33.8 (27.0-41.4) |      | 34.8                        |        |

\*Results are weighted to represent the German residential population. \*\*Data source: German Environment Agency.
